# Supplementary material for: Nanoconfining affinity materials for pH-mediated protein capture–release
Source: Royal Society of Chemistry journal article supplement (doi:10.1039/c4sc01269k), 2014-01-01
Supplement: c4sc01269k1.pdf [file c4sc01269k1.pdf]

*Electronic Supplementary Information for*

**Nanoconfining affinity materials for pH-mediated protein  
capture/release**

Qianjin Li, Xueying Tu, Jin Ye, Zijun Bie, Xiaodong Bi, and Zhen Liu\*

State Key Laboratory of Analytical Chemistry for Life Science, School of Chemistry and  
Chemical Engineering, Nanjing University, Nanjing 210093, P.R. China

## Table of Contents

|                                                                              |    |
|------------------------------------------------------------------------------|----|
| 1. Experimental section.....                                                 | 1  |
| 1.1. Reagents and materials.....                                             | 1  |
| 1.2. Instrumentation .....                                                   | 1  |
| 1.3. Preparation of no-ligand-modified monolithic material .....             | 2  |
| 1.4. Preparation of HPEDA-modified materials .....                           | 3  |
| 1.5. Preparation and post-modification of bulk materials.....                | 4  |
| 1.6. Preparation of protein-functionalized NCAM monolithic columns .....     | 4  |
| 1.7. Determination of dissociation constant.....                             | 4  |
| 1.8. Binding proteins on HPEDA-NCAMB.....                                    | 6  |
| 1.9. Protein hydrolysis on trypsin-functionalized monolithic column.....     | 7  |
| 2. pH-dependent interactions of MBAA and HPEDA with amino acids.....         | 7  |
| 3. Interactions between proteins and HPEDA in free solution .....            | 8  |
| 4. FT-IR spectra of materials .....                                          | 9  |
| 5. Material characteristics measured by BET method .....                     | 10 |
| 6. Protein characteristics .....                                             | 11 |
| 7. Protein binding on HPEDA-NCAM .....                                       | 12 |
| 8. Effect of NaCl on protein binding on HPEDA-NCAM.....                      | 13 |
| 9. Effect of pH on protein binding on HPEDA-NCAM .....                       | 14 |
| 10. Retention of peptides on HPEDA-NCAM.....                                 | 15 |
| 11. Pore size distribution of HPEDA-NCAMB .....                              | 16 |
| 12. The affinity of HPEDA-NCAMB toward different proteins .....              | 16 |
| 13. Enantiomer resolution on HSA-functionalized NCAM monolithic column ..... | 17 |
| 14. Capture of serum proteins by HPEDA-NCAM .....                            | 18 |
| 15. Protein hydrolysis by trypsin-functionalized NCAM monolithic column..... | 19 |
| 16. Improvement of MS detection capability toward serum peptides .....       | 21 |
| Supplementary references.....                                                | 22 |

## 1. Experimental section

### 1.1. Reagents and materials

Ribonuclease A (RNase A), Cytochrome c (Cyt C), Myoglobin (Myo), Bovine serum albumin (BSA), human serum albumin (HSA), Apo-transferrin (Trans),  $\beta$ -lactoglobulin A ( $\beta$ -Lac A), hemoglobin (Hemo), albumin from chicken egg white (OVA), lysozyme (Lyz),  $\beta$ -casein ( $\beta$ -Cas), avidin (Avi), trypsin (Try), glycidyl methacrylate (GMA),  $\gamma$ -methacryloxypropyltrimethoxysilane ( $\gamma$ -MAPS) and HPLC grade acetonitrile (ACN) were purchased from Sigma (St. Louis, MO, USA).  $\alpha$ -Fetoprotein (AFP) from the normal fetal blood, monoclonal antibodies of  $\alpha$ -Fetoprotein (anti-AFP), prostate specific antigen (anti-PSA) and carcinoembryonic antigen (anti-CEA) from mouse were purchased from Shuangliu Zhenglong Biology and Chemistry Research Institute (Chengdu, China); Recombinant human erythropoietin (EPO) was purchased from the European Pharmacopoeia. *N,N'*-methylenebisacrylamide (MBAA), dodecanol, D-tryptophan (D-Trp) and L-tryptophan (L-Trp) were purchased from Alfa Aesar (Ward Hill, MA, USA). Tetramethoxysilane (TMOS), L-histidine (His), L-cysteine (Cys), L-lysine (Lys), DL-serine (Ser) and DL-proline (Pro) were purchased from Aladdin Industrial Corporation (Shanghai, China). Horseradish peroxidase (HRP) was purchased from Sinopharm Chemical Reagent (Shanghai, China). L-aspartic acid (Asp), L-glutamic acid (Glu), L-asparagine (Asn), L-glutamine (Gln), L-arginine (Arg), L-phenylalanine (Phe) and L-tyrosine (Tyr) were purchased from J&K Scientific (Shanghai, China). Dimethyl sulfoxide (DMSO) and 2,2-azobisisobutyronitrile (AIBN, recrystallized in methanol before use) were purchased from Shanghai Fourth Reagent & H.V. Chemicals (Shanghai, China). Poly (ethylene glycol) (PEG,  $M_n = 10\ 000$ ) and acetic acid (HAc) were purchased from Nanjing Chemical Reagent (Nanjing, China). *N*-( $\beta$ -Hydroxypropyl)ethylenediamine (HPEDA), vinyltrimethoxysilane (VTMS) and ethanolamine were purchased from Tokyo Chemical Industry (Shanghai, China). Deionized water was prepared with a Milli-Q water purification system (Millipore, Milford, MA, USA). Other chemical reagents were of analytical grade. Fused-silica capillaries with 50, 150 and 250  $\mu\text{m}$  I.D. and 375  $\mu\text{m}$  O.D. were purchased from Yongnian Optic Fiber Plant (Hebei, China). Profinity™ epoxide resin microbead was produced by Bio-Rad Laboratories (Hercules, CA, USA). The mean particle size of the microbead is about 60  $\mu\text{m}$ .

### 1.2. Instrumentation

Scanning electron microscopy (SEM) analyses were performed on a Hitachi FE-SEM S-4800 (Tokyo, Japan). Nitrogen adsorption-desorption measurements were conducted at 77 K on an ASAP2020 instrument (Micromeritics, Norcross, GA, USA). The FT-IR spectrum was acquired on a Thermo Nicolet iS10 FT-IR spectrometer (Waltham, MA, USA). UV absorbance data were acquired from a Shimadzu UV-3600 spectrophotometer (Kyoto, Japan). Elemental analysis was measured on Elementar Vario Micro (Hanau, German).

All capillary liquid chromatography (CLC) were performed on an UltiMate 3000 nano-liquid chromatography system (Dionex, Sunnyvale, CA) equipped with an LPG-3x00 micropump, an FLM-3100 microflow manager (1:100 split ratio) which guarantees a constant flow rate, an VWD-3400 variable-wavelength UV-vis absorbance detector with a 3 nL flow cell for on-column detection and an WPS-3000 automatic sampler. Chromeleon software from Dionex was used for system operation and data acquisition and processing. The flow rate was set at 1  $\mu\text{L}/\text{min}$  and the column temperature was set at 25  $^{\circ}\text{C}$  in all experiments. The effective lengths of monolithic columns used in all CLC experiments were 25 cm unless other specifications.

Capillary electrophoresis (CE) experiments were conducted on a P/ACE MDQ system (Beckman Coulter, Fullerton, CA, USA) equipped with a diode array detector (DAD). A fused-silica capillary of 50  $\mu\text{m}$  I.D.  $\times$  60 cm (50 cm to detector) was used in separation. All CE experiments were performed at 30  $^{\circ}\text{C}$  under optimum voltage settings (typically 18 kV). Prior to each run, the capillary was rinsed with 0.1 M NaOH (2 min) and running buffer (2 min) in sequence at 20 psi. Samples were injected under pressure at 0.5 psi for 5 s.

Matrix-assisted laser desorption/ionization time of flight mass spectrometry (MALDI-TOF MS) experiments were implemented on an Autoflex mass spectrometer (Brucker Daltonics, Germany). Positive ion spectra were recorded using stainless steel target plate with standard parameter: a nitrogen laser ( $\lambda = 337$  nm), 250 ns pulse duration and 20 kV for accelerating voltage. CHCA (10 mg/mL) and SA (10 mg/mL) dissolved in the mixture of 0.1% trifluoroacetic acid solution: ACN (70: 30, v/v) were used as the matrix for peptides ( $M_w < 6000$  Da) and proteins ( $M_w > 8000$  Da) detection, respectively. First, 0.5  $\mu\text{L}$  sample was spotted on the plate and allowed to dry. Then, 0.5  $\mu\text{L}$  matrix solution was added on the sample spot and allowed to dry. Each spectrum was typically summed with 100 laser shots.

### **1.3. Preparation of no-ligand-modified monolithic material**

No-ligand-modified organic monolithic material (poly(MBAA)) was synthesized by thermo-initiated free radical copolymerization. Prior to the preparation of the monolithic material, the capillary was pretreated with acid, alkali and  $\gamma$ -MAPS according to the procedure reported previously.<sup>[1]</sup> Briefly, a mixture of MBAA (43 mg), DMSO (140 mg), dodecanol (125 mg) and AIBN (1 mg) was vortexed for 5 min and sonicated for 30 min to obtain a homogeneous solution. The vinylized capillary was filled with the polymerization mixture, sealed with rubber at both ends and then submerged into a water bath at 75  $^{\circ}\text{C}$  for 12 h. After the polymerization reaction, the resulting monolithic column was washed with methanol and acetonitrile successively to remove non-reacted residues. This poly(MBAA) monolithic material is designated as NL-NCAM.

## 1.4. Preparation of HPEDA-modified materials

### 1.4.1. Preparation of epoxy-functionalized materials

The preparation of epoxy-functionalized organic-silica hybrid monolithic material is illustrated in Fig. S1 (reactions i). Prior to the preparation of the hybrid monolithic material, the capillary was pretreated with acid and alkali according to the procedure reported previously.<sup>[2]</sup> The epoxy-functionalized hybrid monolithic material was prepared by one-pot process. Briefly, a prepolymerization mixture was first prepared by mixing HAc (0.01 M, 5 mL), PEG (540 mg), TMOS (1.8 mL) and VTMS (0.6 mL) for 1 h at ice bath to form a homogeneous solution. Then, GMA (38.4 mg) and AIBN (1 mg) were added into 0.5 mL prepolymerization mixture. After 15 min sonication, the mixture was injected into the pretreated capillary of 70 cm length with positive pressure. Both ends of the capillary were sealed with silicone rubber. The capillary was immersed into a water bath at 45 °C for 12 h and then at 75 °C for another 12 h. After the polymerization reaction, the resulting monolithic column was washed with water and acetonitrile successively to remove non-reacted residues. This epoxy-functionalized organic-silica hybrid monolithic material is designated as Epoxy-NNCM.

The synthesis route of epoxy-functionalized organic monolithic material (poly(MBAA-co-GMA)) has been previously reported and illustrated in Fig. S1 (reactions i).<sup>[1]</sup> This epoxy-functionalized organic monolithic material is designated as Epoxy-NCAM.

### 1.4.2. Preparation of HPEDA-modified monolithic materials

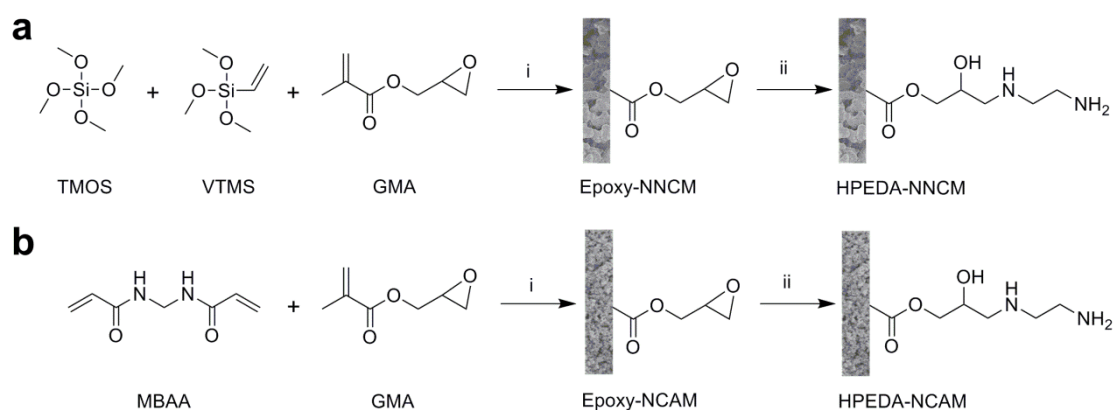

**Fig. S1.** a) Schematic of preparation of HPEDA-modified organic-silica hybrid monolithic material; b) Schematic of preparation of HPEDA-modified organic monolithic material.

The obtained Epoxy-NNCM and Epoxy-NCAM and the commercial Profinity™ epoxide resin microbead (designated as Epoxy-NCAMB) were then reacted with a solution of ethylenediamine/ACN (1:1, v/v) at 60 °C for 12 h, respectively. After the epoxy opening reaction, the resulting materials were washed with acetonitrile thoroughly. Finally, the HPEDA-modified organic-silica monolithic material,

organic monolithic material and microbead were obtained and designated as HPEDA-NNCM, HPEDA-NCAM and HPEDA-NCAMB, respectively.

## 1.5. Preparation and post-modification of bulk materials

Bulk epoxy-functionalized monolithic materials were prepared in centrifuge tubes under the same preparation conditions as described in Section 1.4.1. A piece of bulk Epoxy-NNCM or Epoxy-NCAM (300 mg) was mixed with ethylenediamine/ACN (1:1, v/v), and the mixture was stirred at 60 °C for 12 h. Then the mixture was filtrated and the solid was washed with methanol through a Soxhlet extractor for 12 h, followed by drying under vacuum at 60 °C for 12 h. The resulting bulk HPEDA-modified organic-silica hybrid monolithic material and organic monolithic material were used for nitrogen adsorption-desorption measurements, FT-IR determination and element analysis.

## 1.6. Preparation of protein-functionalized NCAM monolithic columns

HSA-functionalized NCAM monolithic column was prepared as following: an HPEDA-NCAM column (150  $\mu\text{m}$  I.D.  $\times$  60 cm) was first conditioned with the loading buffer (67 mM phosphate buffer, pH 7.4) for 60 min. Then 150  $\mu\text{L}$  of HSA solution (1 mg/mL) was passed through the column under the nitrogen pressure. Thereafter, the column was washed with the loading buffer for 30 min in order to completely flush out the non-adsorbed proteins. The resulting HSA-functionalized NCAM monolithic column was used for the separation of chiral compounds.

Trypsin-functionalized NCAM monolithic column was prepared as following: an HPEDA-NCAM column (150  $\mu\text{m}$  I.D.  $\times$  25 cm) was first conditioned with the loading buffer (50 mM ammonium bicarbonate, pH 8.5) for 60 min. Then 30  $\mu\text{L}$  of trypsin solution (1 mg/mL) was passed through the column under the nitrogen pressure. Thereafter, the column was washed with the loading buffer for 30 min in order to completely flush out the non-adsorbed proteins. The trypsin-functionalized NCAM monolithic column was used as enzyme reactor for protein hydrolysis.

## 1.7. Determination of dissociation constant

### 1.7.1. Determination of dissociation constant ( $K_d$ ) between HPEDA-NNCM and amino acids

The retention times of 13 representative amino acids (containing all types of natural amino acids) on HPEDA-NNCM column (150  $\mu\text{m}$  I.D.  $\times$  50 cm) were determined. The flowing rate was set at 1.5  $\mu\text{L}/\text{min}$ . All of the retention times reported here were the averages of three measurements. The  $K_d$  values were calculated according to the equation (1) reported in the literature:<sup>[3]</sup>

$$K_d = \frac{B_{\max}}{V_t - V_0} \quad (1)$$

where  $B_{\max}$  stands for the total amount of ligands in the column,  $V_t$  is the elution volume of analyte and  $V_0$  is the dead volume.

The total amount of ligands ( $B_{\max}$ ) in the column was estimated by element analysis method. The amounts of elements C, N and H in the material of Epoxy-NNCM were measured to be 30.71%, 0.04% and 5.06%, respectively; while those in the material of HPEDA-NNCM were measured to be 30.25%, 2.61% and 5.42%, respectively. From the contrast of the relative amounts of element N between Epoxy-NNCM and HPEDA-NNCM, the amount of the modified ethylenediamine in HPEDA-NNCM was calculated to be 5.52%; the HPEDA ligand density was thereby calculated to be 0.9 mmol/g. The monolith densities of HPEDA-NNCM was determined to be about 0.5 g/mL. The total amount of ligand HPEDA ( $B_{\max}$ ) in the monolithic column can be calculated by the multiplication of ligand density, monolith density and monolith volume.

Because the  $B_{\max}$  value for poly(MBAA) monolithic column was not measurable, the binding strengths of the poly(MBAA) monolithic column toward amino acids were also not measurable.

### 1.7.2. Determination of $K_d$ between HPEDA and proteins

Dissociation constants between HPEDA and proteins were determined according to the affinity capillary electrophoresis (ACE) method reported previously<sup>[4]</sup> with minor modifications. Briefly, the running buffers were prepared with 100 mM phosphate buffer (pH 7.0) and proteins of varied concentrations, and the samples contained 0.1% (v/v) DMSO (electroosmotic flow marker) and the HPEDA under investigation ( $10^{-5}$  M each). The electropherograms were recorded under a wavelength of 214 nm. Apparent mobility was calculated by the 32Karat software provided by Beckman Coulter. Thus,  $K_d$  can be calculated according to equation (2) on OriginPro8 software:

$$(v\mu_i - \mu_f) = (\mu_b - \mu_f) \frac{[L_f]^n}{K_d + [L_f]^n} \quad (2)$$

where  $v$  is the viscosity correction factor to enhance the measurement accuracy,  $\mu_i$  is the electrophoretic mobility of the target with the presence of ligand,  $\mu_f$  is the electrophoretic mobility of free target,  $\mu_b$  is the electrophoretic mobility of bound target,  $L_f$  is the concentration of the free ligand,  $K_d$  is the apparent dissociation constant, the binding stoichiometry between target and ligand is 1 : n. Because the solubility of MBAA in water is very poor, the binding constant between MBAA and proteins in free solution cannot be measured by the ACE method.

### 1.7.3. Determination of $K_d$ between NCAMs and proteins

The monolithic column (250  $\mu\text{m}$  I.D.  $\times$  7.5 or 20.0 cm) was first conditioned with 50  $\mu\text{L}$  loading buffer (20 mM phosphate buffer, pH 7.0) under the nitrogen pressure. Then 110  $\mu\text{L}$  of protein solution of

a certain concentration was passed through the column, which was collected and designated as solution **S**. Thereafter, the column was washed with 10  $\mu\text{L}$  loading buffer in order to flush out the non-retentive components. Finally, the components bound on the column were eluted by 110  $\mu\text{L}$  of 100 mM HAc (pH 2.7) solution and the collected solution is designated as solution **E**. After repeating above experiment with different protein concentrations, a series of solution **S** and solution **E** were obtained. Standard protein solutions of a series of concentrations were prepared using the loading buffer. The standard protein solutions, solutions **S** and **E** were subsequently subjected to UV absorbance measurement at the wavelength of 280 nm.

Dissociation constant and apparent maximum binding capacity ( $Q_{\text{max}}$ ) were calculated according to the following Scatchard equation (3):<sup>[5]</sup>

$$\frac{Q_e}{C_s} = \frac{Q_{\text{max}}}{K_d} - \frac{Q_e}{K_d} \quad (3)$$

where  $Q_{\text{max}}$  is the saturated adsorption capacity,  $Q_e$  is the amount of protein bound to the monolithic column at equilibrium,  $C_s$  is the free protein concentration at equilibrium. By plotting  $Q_e/C_s$  versus  $Q_e$ , the dissociation constant,  $K_d$ , and the apparent maximum binding capacity,  $Q_{\text{max}}$ , can be calculated from the slope and the intercept, respectively.

#### 1.7.4. Determination of $K_d$ between HPEDA-NCAMB and proteins

HPEDA-NCAMB (0.5-2.0 mg) were mixed with 1 mL protein solution (20 mM phosphate buffer, pH 7.0) in a 1.5 mL centrifuge tube, then the mixture was shocked to make the adsorption sufficient at room temperature. After centrifugation, the upper solution was collected and designated as solution **C**. Thereafter, the microbeads were washed three times using the phosphate buffer, once 1 mL. Finally, 100  $\mu\text{L}$  of 100 mM HAc solution was used to elute out the protein adsorbed by the microbeads. After centrifugation, the elution solution was collected and designated as solution **D**. After repeating above experiment with different protein concentrations, a series of solutions **C** and solutions **D** were obtained. Standard protein solutions with a series of concentrations were prepared using the loading buffer. The standard protein solutions, solutions **C** and solutions **D** were subsequently subjected to UV absorbance measurement at the wavelength of 280 nm. Dissociation constant and apparent maximum binding capacity were calculated according to the Scatchard equation.

### 1.8. Binding proteins on HPEDA-NCAMB

HPEDA-NCAMB (5.0 mg) was mixed with 0.5 mg/mL protein solution (0.5 mg protein was dissolved in 1 mL 20 mM phosphate buffer, pH 7.0) in a 1.5 mL centrifuge tube, then the mixture was shocked for 1 h at room temperature. After centrifugation, the microbeads deposited. Then, the upper solution was depleted. Thereafter, the deposited microbeads were washed three times using the phosphate



buffer, once 1 mL. Finally, 120  $\mu$ L of 100 mM HAc solution was added to elute out the protein adsorbed by the microbeads. The elution solution was collected for UV absorbance measurement at wavelength of 280 nm.

## 1.9. Protein hydrolysis on trypsin-functionalized monolithic column

The trypsin-functionalized monolithic column (150  $\mu$ m I.D.  $\times$  10.0 cm) was first conditioned with 30  $\mu$ L of 50 mM ammonium bicarbonate buffer with pH 8.5 under the nitrogen pressure. Then 2  $\mu$ L HRP solution (1 mg/mL) was filled into the column. Thereafter, both ends of the column was sealed with silicone rubber and immersed into a water bath (37  $^{\circ}$ C) for 2 h. Finally, the eluted components by 4  $\mu$ L loading buffer from the column were collected, diluted by 3-fold trifluoroacetic acid solution (0.1%) and subjected to MALDI-TOF MS for peptide analysis.

## 2. pH-dependent interactions of MBAA and HPEDA with amino acids

**Table S1. Retention times of amino acids on monoliths at different pH values**

| Amino acid | Retention time / min    |                  |                     |        |
|------------|-------------------------|------------------|---------------------|--------|
|            | HPEDA-modified monolith |                  | poly(MBAA) monolith |        |
|            | pH 7.0                  | pH 2.7           | pH 7.0              | pH 2.7 |
| Asp        | 4.87                    | - <sup>[a]</sup> | 9.52                | 9.42   |
| Glu        | 4.78                    | -                | 9.48                | 9.47   |
| Ser        | 4.71                    | 4.54             | 9.68                | 9.44   |
| Cys        | 4.79                    | 4.65             | 10.03               | 9.97   |
| Asn        | 4.64                    | 4.49             | 9.89                | 9.48   |
| Gln        | 4.63                    | 4.52             | 9.74                | 9.49   |
| Arg        | 4.79                    | 4.11             | 10.23               | 9.26   |
| Lys        | 4.57                    | 4.25             | 9.74                | 9.45   |
| Phe        | 5.05                    | 4.78             | 10.90               | 10.40  |
| Tyr        | 5.33                    | 4.95             | 11.39               | 11.37  |
| Trp        | 6.46                    | 5.71             | 14.12               | 11.54  |
| His        | 4.83                    | 4.06             | 10.27               | 8.65   |
| Pro        | 4.68                    | 4.58             | 10.02               | 9.37   |

[a] “-” means the signals of the amino acids were unobservable under the conditions used.

**Table S2. Dissociation constants of amino acids on HPEDA-modified monolith**

| Amino acid | $K_d$ (M) |
|------------|-----------|
| Asp        | 3.26±0.13 |
| Glu        | 3.67±0.48 |
| Ser        | 4.06±0.24 |
| Cys        | 3.63±0.59 |
| Asn        | 4.53±0.34 |
| Gln        | 4.66±0.48 |
| Arg        | 3.61±0.27 |
| Lys        | 5.16±0.63 |
| Phe        | 2.68±0.19 |
| Tyr        | 2.07±0.10 |
| Trp        | 1.10±0.03 |
| His        | 3.44±0.37 |
| Pro        | 4.24±0.18 |

Because the interactions of HPEDA with amino acids were too low to be measurable by the ACE method, the expected properties of MBAA and HPEDA were evaluated in terms of the chromatographic retention of amino acids on a poly(MBAA) monolithic column and a HPEDA-modified organic-silica hybrid monolithic column. Since the molecular size of amino acids are too limited as compared with the pore sizes of the monolith, nanoconfinement effect can be ignored here. All amino acids exhibited stronger retention on these columns at high pH (7.0) than at low pH (2.7) (Table S1). Besides, the binding strengths of the HPEDA-modified monolith toward amino acids were rather weak, with dissociation constant ( $K_d$ ) of 1-5 M (Table S2). These results verify the expected pH-dependent binding properties.

### 3. Interactions between proteins and HPEDA in free solution

**Table S3. Dissociation constants between proteins and HPEDA in free solution**

| Protein        | $K_d$ (M)                    | Correlation coefficient | $n^{[a]}$ |
|----------------|------------------------------|-------------------------|-----------|
| $\beta$ -Lac A | $(4.0\pm 4.0)\times 10^{-2}$ | 0.991                   | 2.1±1.9   |
| $\beta$ -Cas   | $(2.2\pm 0.3)\times 10^{-2}$ | 0.994                   | 2.4±1.3   |
| BSA            | $(1.7\pm 0.3)\times 10^{-2}$ | 0.977                   | 4.6±4.3   |

[a] Binding stoichiometry between protein and HPEDA is 1 : n

We evaluated the binding properties of HPEDA toward proteins in free solution by the ACE method. HPEDA exhibited weak binding strength with three representative proteins ( $K_d$ ,  $\sim 10^{-2}$  M) (Table S3). As compared with the weaker affinity of HPEDA toward amino acids, the higher binding strength toward proteins is attributed to the cooperativity of multiple binding. Thus, if the density of HPEDA on a NCAM is adequate, multiple binding between HPEDA moieties and proteins may also occur on the NCAM, which can enhance the total affinity. Because the solubility of MBAA in water is very poor, the dissociation constant between MBAA and proteins in free solution cannot be measured by the ACE method.

#### 4. FT-IR spectra of materials

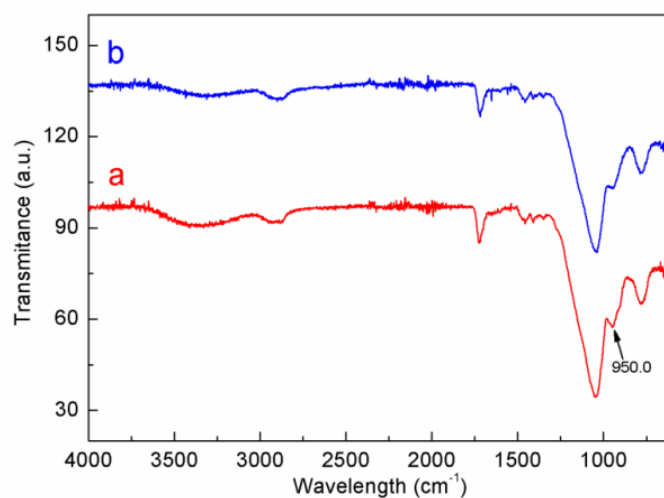

**Fig. S2.** a) FT-IR spectrum of Epoxy-NNCM; b) FT-IR spectrum of HPEDA-NNCM. In comparison with the peaks in trace **a**, the intensity of peak 950.0 cm<sup>-1</sup> decreased in trace **b**, which can be an indicator for the successful reaction between ethylenediamine and epoxy groups on the surface of Epoxy-NNCM.

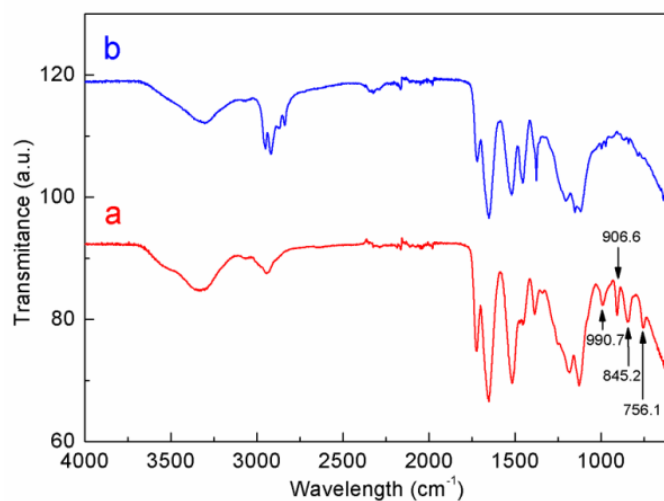

**Fig. S3.** a) FT-IR spectrum of Epoxy-NCAM; b) FT-IR spectrum of HPEDA-NCAM. In comparison with the peaks in trace **a**, the disappearance of peaks between 990.7 and 756.1 cm<sup>-1</sup> in trace **b** can be an indicator for the successful reaction between ethylenediamine and epoxy groups on the surface of Epoxy-NCAM.

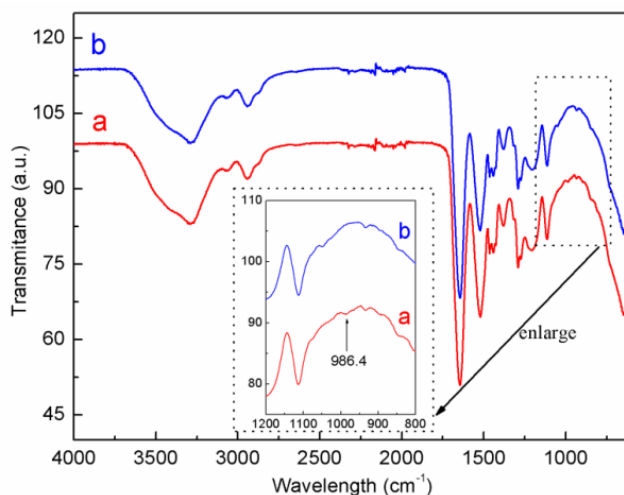

**Fig. S4.** a) FT-IR spectrum of Epoxy-NCAMB; b) FT-IR spectrum of HPEDA-NCAMB. In comparison with the peaks in trace **a**, the disappearance of the peak  $986.4\text{ cm}^{-1}$  in trace **b** can be an indicator for the successful reaction between ethylenediamine and epoxy groups on the surface of Epoxy-NCAMB.

## 5. Material characteristics measured by nitrogen adsorption method

**Table S4** Material characteristics measured by nitrogen adsorption method

| Material    | BET surface area (m <sup>2</sup> /g) | Adsorption average pore width (nm) | BJH adsorption pore volume (cm <sup>3</sup> /g) |
|-------------|--------------------------------------|------------------------------------|-------------------------------------------------|
| NL-NCAM     | 28.7                                 | 3.3                                | 0.029                                           |
| HPEDA-NCAM  | 21.9                                 | 6.7                                | 0.050                                           |
| HPEDA-NNCM  | 55.8                                 | 2.6                                | 0.029                                           |
| HPEDA-NCAMB | 116.5                                | 9.6                                | 0.450                                           |

## 6. Protein characteristics

**Table S5. The properties of the test proteins**

| Name               | $M_w$ (kDa) | Dimension<br>(nm × nm × nm)    | pI        |
|--------------------|-------------|--------------------------------|-----------|
| Cyt C              | 12.4        | 4.2×5.8×5.8 <sup>[6]</sup>     | 10.0-10.5 |
| RNase A            | 13.7        | 4.5×4.6×5.3 <sup>[7]</sup>     | 9.6       |
| Lyz                | 14.3        | 2.7×3.2×3.4 <sup>[8]</sup>     | 11.4      |
| Myo                | 17.6        | 3.1×3.5×6.5 <sup>[9]</sup>     | 7.3, 6.8  |
| β-Lac A            | 18.4        | 6.8×6.8×13.1 <sup>[10]</sup>   | 5.1       |
| Try                | 24.0        | 5.4×5.5×10.7 <sup>[11]</sup>   | 10.1-10.5 |
| β-Cas              | 24.0        | unknown                        | 4.6-5.1   |
| EPO                | 34.0        | 7.3×8.0×13.5 <sup>[12]</sup>   | 4.4-5.1   |
| OVA                | 44.3        | 6.3×7.2×8.5 <sup>[13]</sup>    | 4.5, 4.9  |
| Hemo               | 64.5        | 5.3×5.3×19.2 <sup>[14]</sup>   | 6.8       |
| Avi                | 66.0        | 8.0×8.0×8.5 <sup>[15]</sup>    | 10.0      |
| BSA                | 66.4        | 4.5×14.3×21.2 <sup>[16]</sup>  | 5.3       |
| HSA                | 66.4        | 8.1×18.7×18.7 <sup>[17]</sup>  | 4.6       |
| AFP                | 67.3        | unknown                        | 4.7, 5.3  |
| Trans              | 80.0        | 8.8×10.3×20.0 <sup>[18]</sup>  | 5.2-6.2   |
| IgG <sup>[a]</sup> | 150         | 17.5×27.1×27.1 <sup>[19]</sup> | 7.5-7.9   |

[a] The properties of IgG can represent those for the antibodies anti-AFP, anti-PSA and anti-CEA.

## 7. Protein binding on HPEDA-NCAM

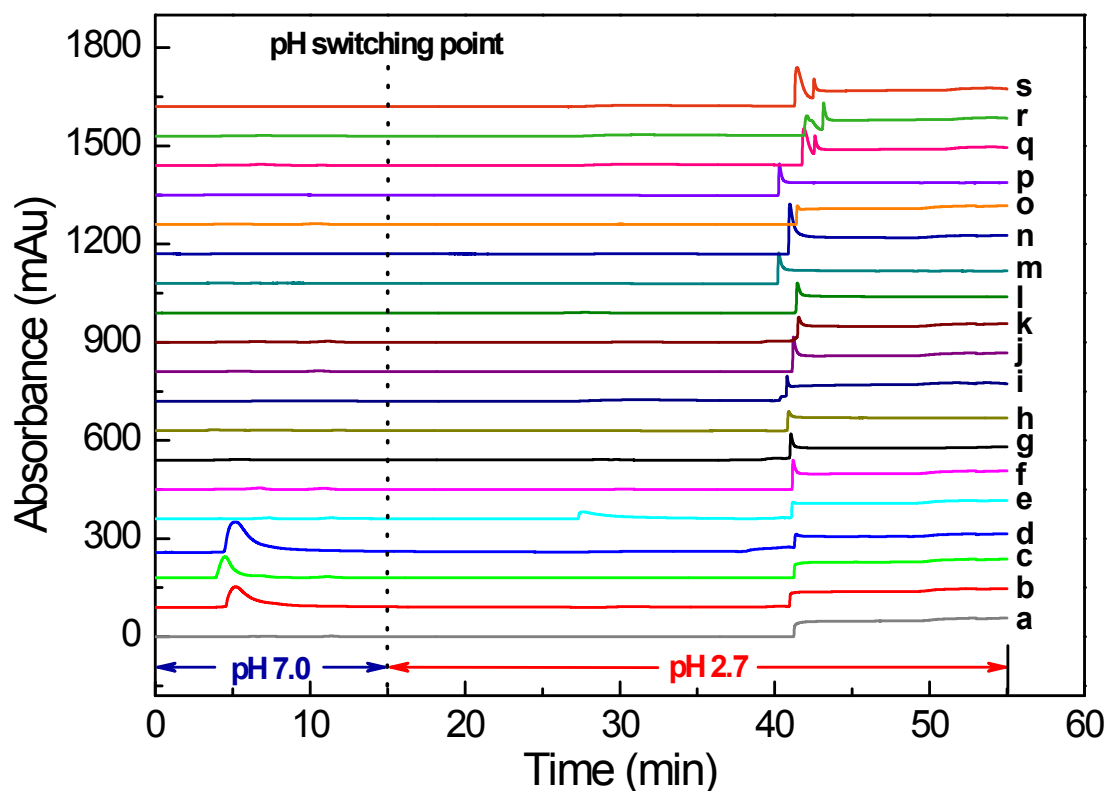

**Fig. S5.** Chromatographic retention of proteins on HPEDA-NCAM monolithic column. Mobile phase: 20 mM sodium phosphate buffer at pH 7.0, switched to 100 mM HAc (pH 2.7) at 15 min; Sample: 1.0 mg/mL protein dissolved in the loading buffer, blank (a), Cyt C (b), RNase A (c), Myo (d), Lyz (e),  $\beta$ -Lac A (f), Try (g),  $\beta$ -Cas (h), EPO (i), OVA (j), Hemo (k), Avi (l), BSA (m), HSA (n), AFP (o), Trans (p), anti-AFP (q), anti-CEA (r), anti-PSA (s); Sample injection volume: 600 nL. Proteins Cyt C (12.4 kDa, trace b), RNase A (13.7 kDa, trace c) and Myo (17.6 kDa, trace d) were not captured by the monolith HPEDA-NCAM. Protein Lyz (14.3 kDa, trace e) was captured loosely by HPEDA-NCAM through electrostatic interaction (Fig. S6). While proteins with molecular weight more than 18 kDa were all captured by HPEDA-NCAM.

## 8. Effect of NaCl on protein binding on HPEDA-NCAM

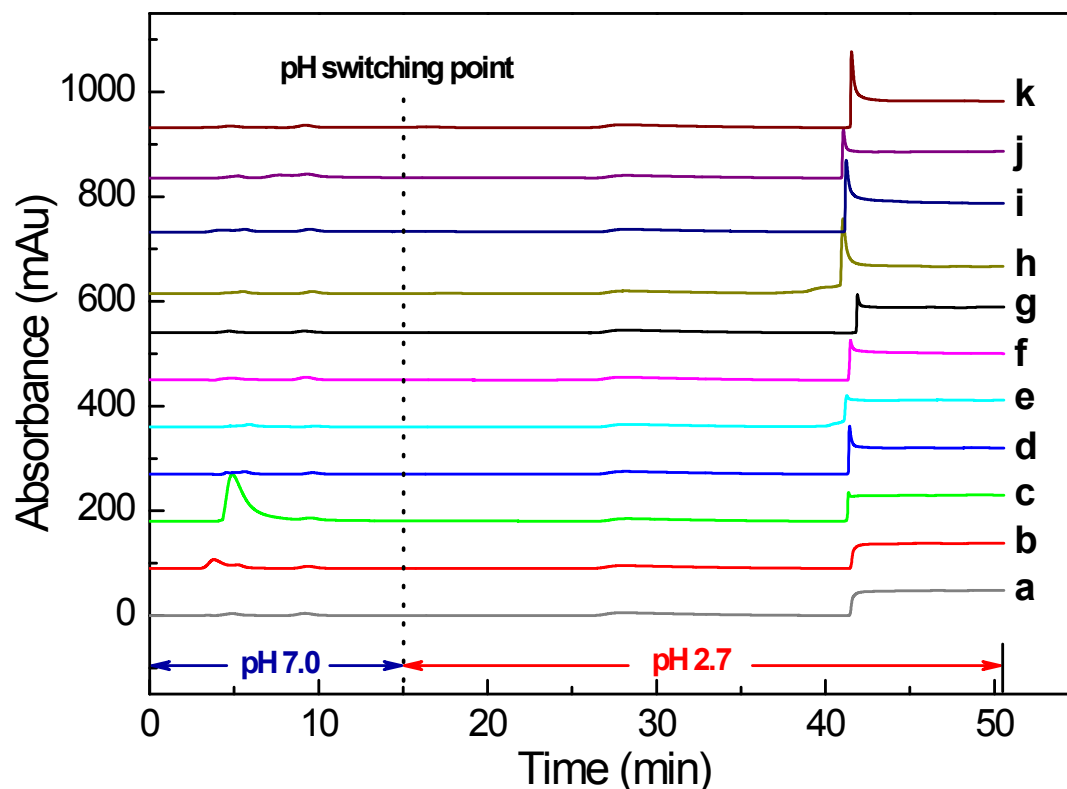

**Fig. S6** Chromatographic retention of the effect of NaCl on the retention of proteins on HPEDA-NCAM monolithic column under salt-containing mobile phase. Mobile phase: 20 mM sodium phosphate with 150 mM NaCl buffer at pH 7.0, switched to 100 mM HAc (pH 2.7) at 15 min; Sample: 1.0 mg/mL protein dissolved in the loading buffer, blank (a), RNase A (b), Lyz (c),  $\beta$ -Lac A (d),  $\beta$ -Cas (e), OVA (f), Hemo (g), BSA (h), AFP (i), Trans (j), anti-AFP (k); Sample injection volume: 600 nL. The NaCl exhibited no influence on binding proteins by HPEDA-NCAM except for Lyz. In compare with the binding behavior in phosphate buffer without NaCl (Fig. S5), it can be confirmed that Lyz was captured mainly through electrostatic interaction on HPEDA-NCAM.

## 9. Effect of pH on protein binding on HPEDA-NCAM

Table S6. Effect of pH on protein binding on HPEDA-NCAM

| Protein        | pH 10.0          | pH 8.5 | pH 7.0 | pH 6.0 |
|----------------|------------------|--------|--------|--------|
| RNase A        | N <sup>[a]</sup> | N      | N      | N      |
| $\beta$ -Lac A | Y <sup>[b]</sup> | Y      | Y      | Y      |
| OVA            | Y                | Y      | Y      | Y      |
| Hemo           | Y                | Y      | Y      | Y      |
| BSA            | Y                | Y      | Y      | Y      |
| AFP            | Y                | Y      | Y      | Y      |
| Trans          | Y                | Y      | Y      | Y      |
| anti-AFP       | Y                | Y      | Y      | Y      |

[a] "N" means protein can not be captured by HPEDA-NCAM; [b] "Y" means protein can be captured by HPEDA-NCAM.



## 10. Retention of peptides on HPEDA-NCAM

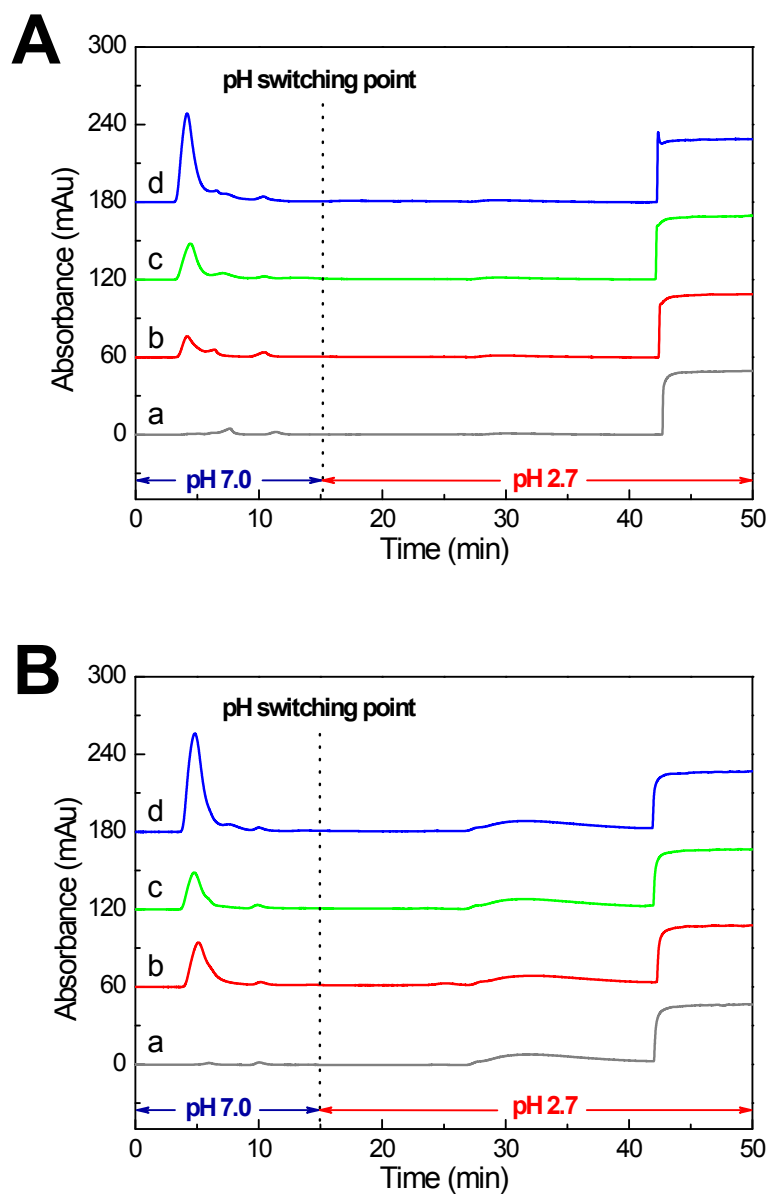

**Fig. S7** Chromatographic retention of peptides on HPEDA-NCAM monolithic column. Mobile phase: 20 mM sodium phosphate buffer at pH 7.0 (**A**) and 20 mM sodium phosphate buffer with 150 mM NaCl at pH 7.0 (**B**), switched to 100 mM HAc (pH 2.7) at 15 min; Sample: blank (**a**), peptides from OVA (**b**), BSA (**c**) and Trans (**d**), hydrolyzed by trypsin; Sample injection volume: 600 nL. Peptides from OVA and BSA exhibited no retention on HPEDA-NCAM (**A**, traces **b** and **c**), only a few peptides from Trans were captured through electrostatic interaction (**A**, trace **d**). All of the peptides from the three proteins exhibited no retention on HPEDA-NCAM under neutral phosphate buffer with 150 mM NaCl (**B**).

## 11. Pore size distribution of HPEDA-NCAMB

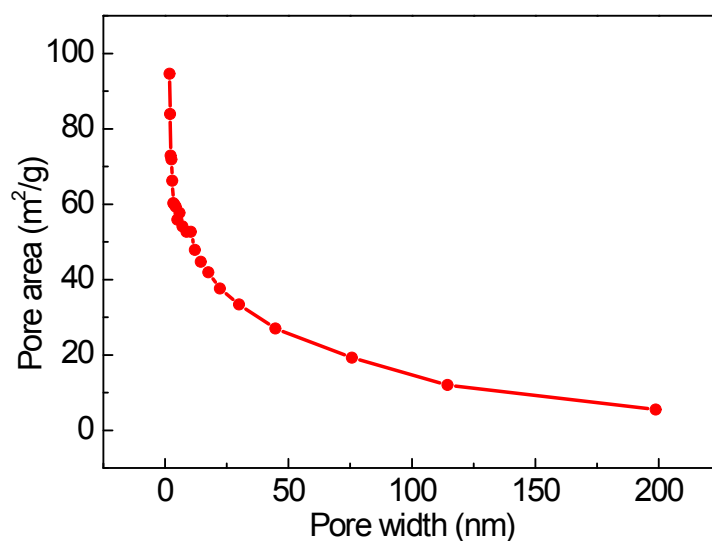

**Fig. S8** Pore size distribution of HPEDA-NCAMB. There are nanopores (5-100 nm) distributed in the material.

## 12. The affinity of HPEDA-NCAMB toward different proteins

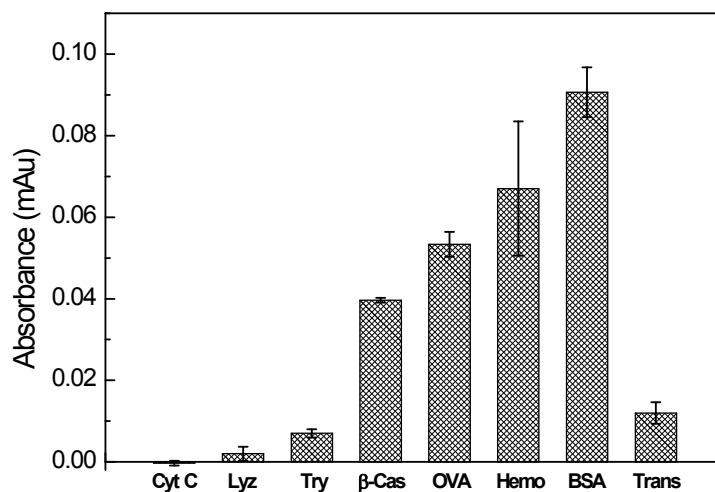

**Fig. S9** Comparison of the amount of different proteins captured by HPEDA-NCAMB. Binding buffer: 20 mM sodium phosphate buffer at pH 7.0; elution solution: 100 mM HAc (pH 2.7); Sample: 0.5 mg/mL protein dissolved in the binding buffer. Proteins with molecular weight more than 18 kDa were all captured by HPEDA-NCAMB, which was very compatible with that for monolithic material HPEDA-NCAM (Fig. S5).

### 13. Enantiomer resolution on HSA-functionalized NCAM monolithic column

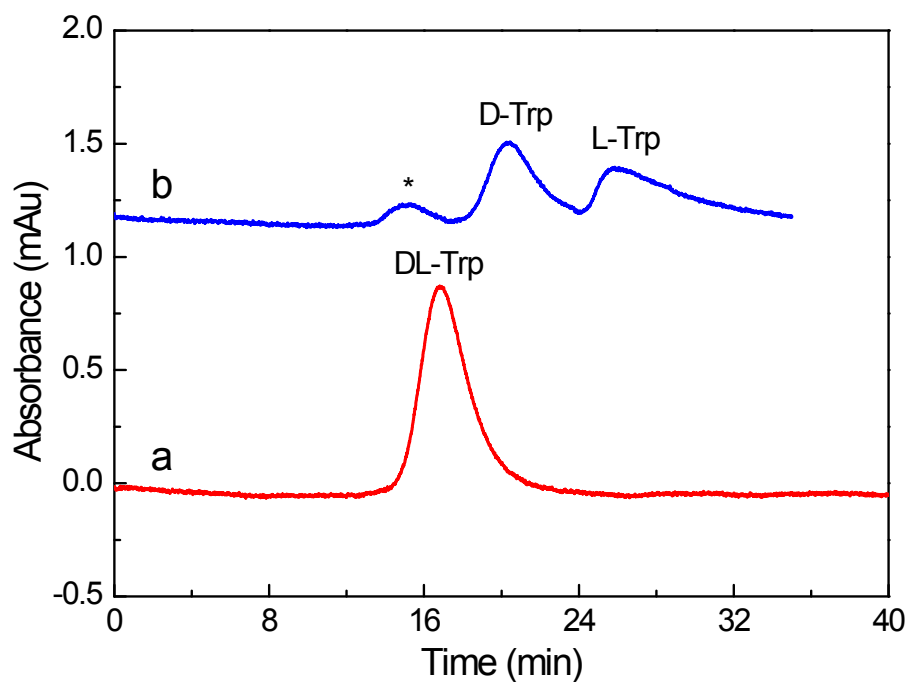

**Fig. S10** Chromatograms for the chiral separation of racemic Trp on HSA-functionalized NCAM monolithic column. Trace **a**, HPEDA-NCAM column exhibited no chiral separation ability. Trace **b**, DL-Trp was separated into two peaks (D-Trp and L-Trp) by HSA-functionalized NCAM monolithic column, which indicated that the HSA adsorbed on the monolith HPEDA-NCAM still retained its biological activity. Mobile phase: 67 mM sodium phosphate buffer at pH 7.4; Sample: 1 mg/mL DL-Trp dissolved in the loading buffer; Sample injection volume: 50 nL; Flowing rate: 0.6  $\mu$ L/min; Detection wavelength: 280 nm. “(\*)” means system peak.

## 14. Capture of serum proteins by HPEDA-NCAM

**Table S7. Proteins mass observed and identified from human serum**

| Peak | m/z    | Protein name <sup>[a]</sup>                       | Captured protein <sup>[b]</sup> |
|------|--------|---------------------------------------------------|---------------------------------|
| 1    | 14033  | Transthyretin, glutathionylated                   | N                               |
| 2    | 17377  | Apolipoprotein A2 ([2M+H] <sup>+</sup> )          | Y                               |
| 3    | 22225  | $\beta_2$ -Glycoprotein I ([M+2H] <sup>2+</sup> ) | Y                               |
| 4    | 28046  | Apolipoprotein A1                                 | Y                               |
| 5    | 33243  | HSA ([M+2H] <sup>2+</sup> )                       | Y                               |
| 6    | 39441  | $\alpha_1$ -Acid glycoprotein                     | Y                               |
| 7    | 44272  | $\beta_2$ -Glycoprotein I                         | Y                               |
| 8    | 50818  | $\alpha_1$ -Proteinase inhibitor                  | Y                               |
| 9    | 56174  | Hemopexin or Antithrombin III                     | Y                               |
| 10   | 66398  | HSA                                               | Y                               |
| 11   | 73724  | IgG ([M+2H] <sup>2+</sup> )                       | Y                               |
| 12   | 79296  | Transferrin                                       | Y                               |
| 13   | 83324  | unknown                                           | Y                               |
| 14   | 88652  | Plasminogen                                       | Y                               |
| 15   | 94653  | unknown                                           | Y                               |
| 16   | 99922  | Haptoglobin                                       | Y                               |
| 17   | 111038 | unknown                                           | Y                               |
| 18   | 117562 | unknown                                           | N                               |
| 19   | 132804 | HSA ([2M+H] <sup>+</sup> )                        | Y                               |
| 20   | 146126 | Ig G                                              | Y                               |
| 21   | 161016 | Ig A or Inter- $\alpha$ -trypsin inhibitor        | Y                               |
| 22   | 199162 | C3 complement                                     | Y                               |

[a] Proteins were identified by comparing m/z values with the references reported<sup>[20]</sup>; [b] “Y” means the protein was captured, while “N” means the protein was not captured by HPEDA-NCAM.

## 15. Protein hydrolysis by trypsin-functionalized NCAM monolithic column

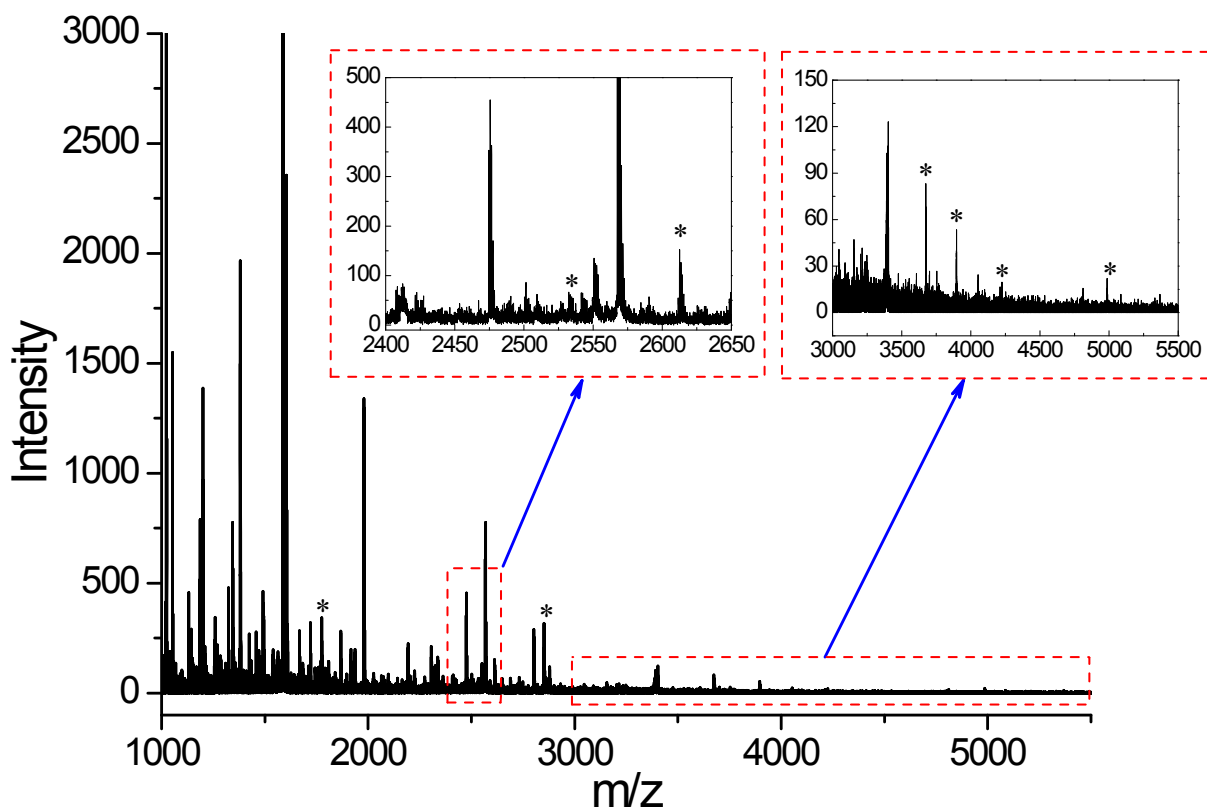

**Fig. S11** MALDI-TOF MS spectrum of HRP digest by trypsin-functionalized NCAM monolithic column. The glycopeptides were marked with the symbol “\*”. HRP was hydrolyzed in the trypsin-functionalized NCAM monolithic column, indicating that the trypsin retained its enzyme activity in column.

**Table S8. Identified peptides from HRP digest by trypsin-functionalized NCAM monolithic column**

| NO. <sup>[a]</sup> | m/z    | Peptide sequence <sup>[b]</sup>                 |
|--------------------|--------|-------------------------------------------------|
| 1                  | 1022.6 | DAFGNANSAR                                      |
| 2                  | 1162.7 | MKAAVESACPR                                     |
| 3                  | 1185.7 | YYVNLEEK                                        |
| 4                  | 1199.7 | SDPRIAASILR                                     |
| 5                  | 1380.8 | TEKDAFGNANSAR                                   |
| 6                  | 1475.9 | SSDLVALSGGHTFGK                                 |
| 7                  | 1587.0 | MGNITPLTGTQGQIR                                 |
| 8                  | 1808.1 | DAFGNANSARGFPVIDR                               |
| 9*                 | 1843.0 | NVGLNR                                          |
| 10                 | 1915.1 | GLCPLNGNLSALVDFDLR                              |
| 11                 | 1977.2 | SSDLVALSGGHTFGKNQCR                             |
| 12                 | 2074.3 | MGNITPLTGTQGQIRLNCR                             |
| 13                 | 2183.3 | SFANSTQTFNFAFVEAMDR                             |
| 14                 | 2501.5 | GLIQSDQELFSSPNATDTIP LVR                        |
| 15*                | 2532.4 | SFANSTQTFNFAFVEAMDR                             |
| 16*                | 2611.6 | MGNITPLTGTQGQIR                                 |
| 17*                | 2850.8 | GLIQSDQELFSSPNATDTIP LVR                        |
| 18*                | 3672.2 | GLIQSDQELFSSPNATDTIP LVR                        |
| 19*                | 3895.2 | LYNFSNTGLPDPTLNNTTYLQ<br>TLRGLCPLNGNLSALVDFDL R |
| 20*                | 4224.4 | QLTPTFYDNPCPNVSNIVR                             |
| 21*                | 4985.6 | LYNFSNTGLPDPTLNNTTYLQ<br>TLRGLCPLNGNLSALVDFDL R |

[a] The glycopeptides were marked with the symbol “\*”; [b] Peptide sequence was identified according to the way reported by the reference<sup>[21]</sup>.

## 16. Improvement of MS detection capability toward serum peptides

Table S9. Peptides mass observed and identified from human serum<sup>[a]</sup>

| NO. | m/z (b) | Peptide <sup>[b]</sup>      | NO. | m/z (d) | Peptide                     |
|-----|---------|-----------------------------|-----|---------|-----------------------------|
| 1   | 1017.6  | Fibrinopeptide A, fragment  | 25  | 1519.6  | unknown                     |
| 2   | 1033.5  | unknown                     | 26  | 1573.9  | unknown                     |
| 3   | 2086.1  | unknown                     | 27  | 1587.9  | unknown                     |
| 4   | 3165.6  | unknown                     | 28  | 1609.9  | unknown                     |
| NO. | m/z (c) | Peptide                     | 29  | 1615.9  | unknown                     |
| 1   | 1078.0  | Fibrinopeptide A, fragment  | 30  | 1632.9  | unknown                     |
| 2   | 1113.4  | unknown                     | 31  | 1685.0  | unknown                     |
| 3   | 1786.8  | ITIH4, fragment             | 32  | 1699.0  | unknown                     |
| 4   | 1793.8  | unknown                     | 33  | 1728.0  | unknown                     |
| 5   | 1808.8  | Apolipoprotein A1, fragment | 34  | 1740.9  | Complement C4a, fragment    |
| 6   | 1824.9  | unknown                     | 35  | 1762.9  | Complement C4a, fragment    |
| 7   | 1943.8  | Kininogen, fragment         | 36  | 1786.8  | ITIH4, fragment             |
| 8   | 2010.9  | unknown                     | 37  | 1796.0  | unknown                     |
| 9   | 2032.9  | ITIH4, fragment             | 38  | 1802.8  | unknown                     |
| 10  | 2267.1  | ITIH4, fragment             | 39  | 1808.8  | Apolipoprotein A1, fragment |
| 11  | 2390.2  | unknown                     | 40  | 1810.1  | unknown                     |
| 12  | 2754.3  | Apolipoprotein A4, fragment | 41  | 1839.1  | unknown                     |
| 13  | 3362.6  | unknown                     | 42  | 1855.8  | unknown                     |
| NO. | m/z (d) | Peptide                     | 43  | 1891.0  | unknown                     |
| 1   | 1018.6  | Fibrinopeptide A, fragment  | 44  | 1921.1  | unknown                     |
| 2   | 1032.6  | unknown                     | 45  | 1943.9  | Kininogen, fragment         |
| 3   | 1076.6  | Fibrinopeptide A, fragment  | 46  | 1949.1  | unknown                     |
| 4   | 1121.5  | unknown                     | 47  | 1965.1  | unknown                     |
| 5   | 1129.6  | unknown                     | 48  | 2010.9  | unknown                     |
| 6   | 1143.7  | unknown                     | 49  | 2026.9  | ITIH4, fragment             |
| 7   | 1171.6  | unknown                     | 50  | 2032.9  | unknown                     |
| 8   | 1187.6  | unknown                     | 51  | 2076.2  | unknown                     |
| 9   | 1240.7  | unknown                     | 52  | 2109.0  | unknown                     |
| 10  | 1254.7  | unknown                     | 53  | 2143.3  | unknown                     |
| 11  | 1276.7  | Clusterin beta, fragment    | 54  | 2238.1  | unknown                     |
| 12  | 1298.7  | unknown                     | 55  | 2254.3  | unknown                     |
| 13  | 1324.6  | unknown                     | 56  | 2271.1  | unknown                     |
| 14  | 1337.5  | unknown                     | 57  | 2283.1  | ITIH4, fragment             |
| 15  | 1351.8  | Fibrinopeptide A, fragment  | 58  | 2299.1  | unknown                     |
| 16  | 1365.8  | unknown                     | 59  | 2305.1  | Complement C4a, fragment    |
| 17  | 1387.8  | unknown                     | 60  | 2358.1  | ITIH4, fragment             |
| 18  | 1395.6  | unknown                     | 61  | 2425.2  | unknown                     |
| 19  | 1409.8  | unknown                     | 62  | 2602.3  | Factor XIIIa, fragment      |
| 20  | 1432.8  | unknown                     | 63  | 2627.3  | ITIH4, fragment             |
| 21  | 1436.7  | unknown                     | 64  | 2724.3  | ITIH4, fragment             |
| 22  | 1462.8  | Fibrinopeptide A, fragment  | 65  | 2753.0  | Apolipoprotein A4, fragment |
| 23  | 1476.9  | unknown                     | 66  | 2816.3  | Fibrinogen A, fragment      |
| 24  | 1498.8  | Complement C4a, fragment    | 67  | 2829.4  | unknown                     |

[a] The color blue, red and black represents the peaks observed for b, c and d in Fig. S12. [b] Peptides were identified by comparing m/z values with the references reported<sup>[20]</sup>.

## Supplementary references

- [1] Q. J. Li, C. C. Lu, Z. Liu, *J. Chromatogr. A* **2013**, *1305*, 123-130.
- [2] Q. J. Li, C. C. Lu, H. Y. Li, Y. C. Liu, H. Y. Wang, X. Wang, Z. Liu, *J. Chromatogr. A* **2012**, *1256*, 114-120.
- [3] H. A. Engstrom, R. Johansson, P. Koch-Schmidt, K. Gregorius, S. Ohlson, M. Bergstrom, *Biomed. Chromatogr.* **2008**, *22*, 272-277.
- [4] C. C. Lu, H. Y. Li, H. Y. Wang, Z. Liu, *Anal. Chem.* **2013**, *85*, 2361-2369.
- [5] L. Li, Y. Lu, Z. J. Bie, H. Y. Chen, Z. Liu, *Angew. Chem. Int. Ed.* **2013**, *52*, 7451-7454.
- [6] G. W. Bushnell, G. V. Louie, G. D. Brayer, *J. Mol. Biol.* **1990**, *214*, 585-595.
- [7] M. H. Dung, J. A. Bell, *Acta Crystallogr. Sect. D-Biol. Crystallogr.* **1997**, *53*, 419-425.
- [8] M. A. Walsh, T. R. Schneider, L. C. Sieker, Z. Dauter, V. S. Lamzin, K. S. Wilson, *Acta Crystallogr. Sect. D-Biol. Crystallogr.* **1998**, *54*, 522-546.
- [9] H. C. Watson, *Prog. Stereochem.* **1969**, *4*, 299.
- [10] J. J. Adams, B. F. Anderson, G. E. Norris, L. K. Creamer, G. B. Jameson, *J. Struct. Biol.* **2006**, *154*, 246-254.
- [11] H. K. S. Leiros, B. O. Brandsdal, O. A. Andersen, V. Os, I. Leiros, R. Helland, J. Otlewski, N. P. Willassen, A. O. Smalas, *Protein Sci.* **2004**, *13*, 1056-1070.
- [12] R. S. Syed, S. W. Reid, C. W. Li, J. C. Cheetham, K. H. Aoki, B. S. Liu, H. J. Zhan, T. D. Osslund, A. J. Chirino, J. D. Zhang, J. Finer-Moore, S. Elliott, K. Sitney, B. A. Katz, D. J. Matthews, J. J. Wendoloski, J. Egrie, R. M. Stroud, *Nature* **1998**, *395*, 511-516.
- [13] P. E. Stein, A. G. W. Leslie, J. T. Finch, R. W. Carrell, *J. Mol. Biol.* **1991**, *221*, 941-959.
- [14] S. Y. Park, T. Yokoyama, N. Shibayama, Y. Shiro, J. R. H. Tame, *J. Mol. Biol.* **2006**, *360*, 690-701.
- [15] L. Pugliese, A. Coda, M. Malcovati, M. Bolognesi, *J. Mol. Biol.* **1993**, *231*, 698-710.
- [16] A. Bujacz, *Acta Crystallogr. Sect. D-Biol. Crystallogr.* **2012**, *68*, 1278-1289.
- [17] D. C. Carter, X. M. He, S. H. Munson, P. D. Twigg, K. M. Gernert, M. B. Broom, T. Y. Miller, *Science* **1989**, *244*, 1195-1198.
- [18] J. Wally, P. J. Halbrooks, C. Vonrhein, M. A. Rould, S. J. Everse, A. B. Mason, S. K. Buchanan, *J. Biol. Chem.* **2006**, *281*, 24934-24944.
- [19] E. O. Saphire, P. Parren, R. Pantophlet, M. B. Zwick, G. M. Morris, P. M. Rudd, R. A. Dwek, R. L. Stanfield, D. R. Burton, I. A. Wilson, *Science* **2001**, *293*, 1155-1159.
- [20] G. L. Hortin, *Clin. Chem.* **2006**, *52*, 1223-1237.
- [21] J. Liu, F. Wang, H. Lin, J. Zhu, Y. Bian, K. Cheng, H. Zou, *Anal. Chem.* **2013**, *85*, 2847-2852.
